# Supplementary material for: Directed evolution of the rRNA methylating enzyme Cfr reveals molecular basis of antibiotic resistance
Source: PubMed Central journal article supplement (PMC8752094; doi:10.7554/elife.70017), 2022-01-11
Supplement: elife-70017-supp1.pdf [file elife-70017-supp1.pdf]

1 Supplementary Files for

2  
3 **Directed evolution of the rRNA methylating enzyme Cfr reveals molecular**  
4 **basis of antibiotic resistance**

5 *Short title: Directed evolution of the Cfr resistance enzyme*

6  
7  
8 Kaitlyn Tsai, Vanja Stojković, Lianet Noda-Garcia, Iris D. Young, Alexander G. Myasnikov, Jordan  
9 Kleinman, Ali Palla, Stephen N. Floor, Adam Frost, James S. Fraser, Dan S. Tawfik, Danica Galonić  
10 Fujimori

11 Correspondence to: [Danica.Fujimori@ucsf.edu](mailto:Danica.Fujimori@ucsf.edu)

12  
13 **This file includes:**

14 A. Supplementary files 1A-D  
15

1

| Primer Name                         | Application           | Sequence                                                                                                                             |
|-------------------------------------|-----------------------|--------------------------------------------------------------------------------------------------------------------------------------|
| GS1-1XFLAG                          | Fastcloning Insertion | Fwd: 5'-GATTACAAGGATGACGACGATAAGTGAGCGGCCGCAA<br>ACATGGTAC-3'<br>Rev: 5'-CATCCTTGTAATCGCTACCACCACCTTGGCTATTTTGAT<br>AATTACC-3'       |
| CfrN2K(AAA)                         | Mutagenesis           | Fwd: 5'-AGCTAACCGATGAAATTTAATAATAAAAAC-3'<br>Rev: 5'-GTTTTATTATTAATTTTCATCGGTTAGCT-3'                                                |
| CfrN2K(AAG)                         | Mutagenesis           | Fwd: 5'-AGCTAACCGATGAAGTTTAATAATAAAAAC-3'<br>Rev: 5'-GTTTTATTATTAACCTTCATCGGTTAGCT-3'                                                |
| CfrN2I(AUU)                         | Mutagenesis           | Fwd: 5'-AGCTAACCGATGATTTTTAATAATAAAAAC-3'<br>Rev: 5'-GTTTTATTATTAATAATTCATCGGTTAGCT-3'                                               |
| CfrN2I(AUA)                         | Mutagenesis           | Fwd: 5'-AGCTAACCGATGATATTTAATAATAAAAAC-3'<br>Rev: 5'-GTTTTATTATTAATAATATCATCGGTTAGCT-3'                                              |
| CfrI26M                             | Mutagenesis           | Fwd: 5'-TGAGCCTGATTATAGAATGAAACAAATAACCAATGCG-3'<br>Rev: 5'-CGCATTGGTTATTTGTTTCATTCTATAATCAGGCTCA-3'                                 |
| CfrS39G                             | Mutagenesis           | Fwd: 5'-GATTTTTAAACAAAGAATTGGTCGATTTGAGGATATGAA-3'<br>Rev: 5'-TTCATATCCTCAAATCGACCAATTCTTTGTTTAAAAATC-3'                             |
| MK(AAA)E-Cfr                        | Fastcloning Insertion | Fwd: 5'- <b>ATGAAAGAAATGAATTTAATAATAAAAACAAAGTATG</b><br><b>GTAAAATACAG-3'</b><br>Rev: 5'-ATTCATTTCTTTCATCGGTTAGCTTATCGATAC-3'       |
| MK(AAG)E-Cfr                        | Fastcloning Insertion | Fwd: 5'- <b>ATGAAGGAAATGAATTTAATAATAAAAACAAAGTATG</b><br><b>GTAAAATACAG-3'</b><br>Rev: 5'-ATTCATTTCTTTCATCGGTTAGCTTATCGATAC-3'       |
| CfrM95L                             | Mutagenesis           | Fwd: 5'-GTAGAAACGGTAAACCTGAAGTATAAAGCAG-3'<br>Rev: 5'-CTGCTTTATACTTCAGGTTTACCGTTTCTAC-3'                                             |
| TrunM26-Cfr                         | Fastcloning Deletion  | Fwd: 5'-TCGATAAGCTAACCGATGAAACAAATAACCAATGCG-3'<br>Rev: 5'-CGGTTAGCTTATCGATACCGTCGACC-3'                                             |
| CfrC338A                            | Mutagenesis           | Fwd: 5'-_ATTGACGCTGCTGCTGGTCAATTATATG-3'<br>Rev: 5'-_CATATAATTGACCAGCAGCAGCGTCAAT-3'                                                 |
| cfr                                 | RT-qPCR               | Fwd: 5'-AGCAGAGCAAATTCAGAGCAAGT-3'<br>Rev: 5'-TCCAATGTCGCCTGTAGCACAA-3'<br>Length of amplicon: 169 bp                                |
| luc<br>Accession no:<br>X65316.2    | RT-qPCR               | Fwd: 5'-AGATCGTGGATTACGTCGCC-3'<br>Rev: 5'-TGGACTTCCGCCCTTCTTG-3'<br>Length of amplicon: 156 bp                                      |
| recA<br>Accession no:<br>CP037857.1 | RT-qPCR               | Fwd: 5'-ATCGCCTGGCTCATCATACG-3'<br>Rev: 5'-GCACTGGAAATCTGTGACGC-3'<br>Length of amplicon: 152 bp                                     |
| CfrM(-3)I                           | Mutagenesis           | Fwd: 5'-TTACCACTAGAGCAAATTGTGAAAGGATCAAAGAAATG-3'<br>Rev: 5'-CCTGTATTTTACCATACTTTGTTTTATTATTAATAATTC<br>ATTTCTTTGATCCTTTC-3'         |
| CfrM1I                              | Mutagenesis           | Fwd: 5'-CACTAGAGCAAATTGTGAAAGGATGAAAGAAATCAATT<br>TTAA-3'<br>Rev: 5'-CCTGTATTTTACCATACTTTGTTTTATTATTAATAATTC<br>ATTTCTTTCATCCTTTC-3' |

2

3 **Supplementary file 1A. Primer sequences used in this study.** All primers were purchased  
4 from Integrated DNA Technologies (IDT) or Elim Biopharm and prepared with standard  
5 desalting purification methods.

1

| Tiamulin<br>µg/mL             | Colony #  | Mutations                                                          | 2 <sup>nd</sup><br>Codon |
|-------------------------------|-----------|--------------------------------------------------------------------|--------------------------|
| 400<br>Enrichment<br>Round 1  | 2 (CfrV6) | Promoter, I26M, E351Stop, 3'UTR-INS                                | AAU                      |
|                               | 3         | <b>N2K</b> , S39G, I326V, Q346H, E351Stop                          | AAA                      |
|                               | 4         | <b>N2K</b> , S39G, N57D, S348C, E351Stop, 3'UTR-INS                | AAA                      |
|                               | 5         | <b>N2K</b> , S18R, E266D, E351Stop                                 | AAA                      |
|                               | 6 (CfrV2) | <b>N2K</b> , S39G, E351Stop                                        | AAA                      |
| 500<br>Enrichment<br>Round 1  | 1         | <b>N2K</b> , I26M, S273R, E351Stop                                 | AAA                      |
|                               | 2         | <b>N2K</b> , S39G, N347K, S348Stop                                 | AAA                      |
|                               | 3 (CfrV3) | <b>N2K</b> , I26M, S39G, E351Stop, 3'UTR-INS                       | AAA                      |
|                               | 5         | <b>N2K</b> , S39G, K198N, Q346Stop                                 | AAA                      |
|                               | 6         | <b>N2K</b> , S39G, E351Stop, 3'UTR-INS                             | AAA                      |
| 600<br>Enrichment<br>Round 1  | 7         | <i>N2I</i> , S39G, Q202H, M301K, E351Stop, 3'UTR-INS               | AUU                      |
|                               | 1 (CfrV1) | <b>N2K</b> , I26M, E351Stop, 3'UTR-INS                             | AAA                      |
|                               | 2         | <i>N2I</i> , I26M, N73H, E351Stop                                  | AUU                      |
|                               | 4         | <b>N2K</b> , N20S, K35R, S39G, L68F, N238D, L265H, E351Stop        | AAA                      |
|                               | 5         | <i>N2I</i> , S39G, Q349Stop, 3'UTR-INS                             | AUU                      |
| 700<br>Enrichment<br>Round 1  | 1 (CfrV7) | Promoter, S39G, E351Stop, 3'UTR-INS                                | AAU                      |
|                               | 2         | N5K, S39G, I233L, E351Stop                                         | AAU                      |
|                               | 4         | <i>N2I</i> , I26M, S39G, G308V, E351Stop                           | AUU                      |
|                               | 5         | S39G, L68F, G115R, K198R, E351Stop, 3'UTR-INS                      | AAC*                     |
|                               | 6         | S39G, L289M, E351Stop, 3'UTR-INS                                   | AAC*                     |
|                               | 7         | <i>N2I</i> , S39G, E351Stop, 3'UTR-INS                             | AUU                      |
|                               | 8         | <b>N2K</b> , I26M, N238D, E351Stop                                 | AAA                      |
| 800<br>Enrichment<br>Round 1  | 1         | <b>N2K</b> , S39G, Q346R, Q349Stop, 3'UTR-INS                      | AAA                      |
|                               | 2         | <i>N2I</i> , S39G, I233L, P259H, Q349Stop, 3'UTR-INS               | AUU                      |
|                               | 4         | N5I, K35R, S39G, E351Stop, 3'UTR-INS                               | AAC*                     |
|                               | 5         | Promoter, L68F, S348N, E351Stop, 3'UTR-INS                         | AAU                      |
|                               | 6         | Promoter, I26M, K45Q, L68F, E351Stop, 3'UTR-INS                    | AAU                      |
| 1000<br>Enrichment<br>Round 2 | 1         | Promoter, <i>N2I</i> , D23E, I26M, A305T, Q349Stop, 3'UTR-INS      | AUU                      |
|                               | 2         | <b>N2K</b> , S39G, Q346R, E351Stop, 3'UTR-INS                      | AAA                      |
|                               | 3         | <b>N2K</b> , I26M, T62A, E351Stop                                  | AAA                      |
|                               | 4         | N5K, S39G, A305T, E351Stop                                         | AAU                      |
|                               | 6         | <b>N2K</b> , S39G, N65S, Q349Stop, 3'UTR-INS                       | AAA                      |
|                               | 7 (CfrV5) | <i>N2I</i> , S39G, E351Stop, 3'UTR-INS                             | AUU                      |
| 1250<br>Enrichment<br>Round 2 | 8         | <b>N2K</b> , I26M, Q349Stop, 3'UTR-INS                             | AAA                      |
|                               | 2         | S39G, L68F, G115R, K198R, E351Stop, 3'UTR-INS                      | AAC*                     |
|                               | 4         | Promoter, Y127F, D234G, E351Stop, 3'UTR-INS                        | AAC*                     |
|                               | 5         | Promoter, I26M, S39G, Q72K, S85T, E351Stop, 3'UTR-INS              | AAU                      |
|                               | 6         | <b>N2K</b> , I26M, N65S, Q349Stop, 3'UTR-INS                       | AAA                      |
|                               | 7 (CfrV4) | <b>N2K</b> , I26M, L68F, E351Stop, 3'UTR-INS                       | AAA                      |
| 1500<br>Enrichment<br>Round 2 | 8         | Promoter, N5K, S39G, S273N, S277R, K315E, E351Stop                 | AAU                      |
|                               | 1         | Promoter, <b>N2K</b> , R17S, N73H, E351Stop                        | AAA                      |
|                               | 2         | <b>N2K</b> , S39G, S196G, E270K, G308R, K315R, E351Stop, 3'UTR-INS | AAA                      |
|                               | 4         | Promoter, <b>N2K</b> , S39G, Q346H, S348I, 3'UTR-INS               | AAA                      |
|                               | 5         | Promoter, I26M, Q36L, N347K, S348Stop, 3'UTR-INS                   | AAU                      |
|                               | 6         | Promoter, <i>N2I</i> , D23E, I26M, A305T, Q349Stop, 3'UTR-INS      | AUU                      |
|                               | 7         | <b>N2K</b> , S39G, E351Stop                                        | AAA                      |
|                               | 8         | Promoter, S39G, E351Stop, 3'UTR-INS                                | AAU                      |

1 **Supplementary file 1B. Evolved Cfr sequence variants observed during final enrichment**  
2 **rounds of directed evolution.** Open reading frame mutations and alterations to sequences 5'  
3 (promoter) and 3' (insertion in 3' untranslated region) of the *cfr* gene are designated. Green  
4 lettering designates to the original Asn codon in CfrWT, while green with \* designates an Asn  
5 synonymous codon. N2K(AAA) codon is in red, while N2I(AUU) codon is in blue.

1

| Enrichment Round | Tiamulin $\mu\text{g/mL}$ | Colony #                 | Promoter Architecture                  |
|------------------|---------------------------|--------------------------|----------------------------------------|
| -                | -                         | CfrWT                    | Ptet – cfr                             |
| 1                | 400                       | 2 (CfrV6)                | Ptet – Ins – Ptet – cfr                |
|                  | 700                       | 1 (CfrV7)                | Ptet – Ins – pPtet – cfr               |
|                  | 800                       | 5                        | Ptet – Ins – pPtet – cfr               |
|                  | 800                       | 6                        | Ptet – Ins – pPtet – cfr               |
| 2                | 1000                      | 1                        | Ptet – Ins – pPtet – cfr               |
|                  | 1250                      | 4                        | Ptet – Ins – pPtet – cfr               |
|                  | 1250                      | 5                        | Ptet – Ins – pPtet – cfr               |
|                  | 1250                      | 8                        | Ptet – Ins – pPtet – cfr               |
|                  | 1500                      | 1                        | Ptet – Ins – pPtet – cfr               |
|                  | 1500                      | 4                        | Ptet – Ins – pPtet – cfr               |
|                  | 1500                      | 5                        | Ptet – Ins – pPtet – Ins – pPtet – cfr |
|                  | 1500                      | 6                        | Ptet – Ins – pPtet – cfr               |
| 1500             | 8                         | Ptet – Ins – pPtet – cfr |                                        |

2 **Supplementary file 1C. Promoter architecture of evolved Cfr variants from final**  
3 **enrichment rounds with promoter alterations.** Abbreviations: Ptet = promoter; Ins = insertion  
4 sequence of various length; pPtet = partial promoter.

1

| pZA             | TIA MIC $\mu\text{g/mL}$ |
|-----------------|--------------------------|
| Empty           | 400-800                  |
| CfrWT-GS1-FLAG  | 1600                     |
| CfrV1-GS1-FLAG  | 6400                     |
| CfrV2-GS1-FLAG  | 6400                     |
| CfrV3-GS1-FLAG  | 3200-6400                |
| CfrV4-GS1-FLAG  | 6400                     |
| CfrV6-GS1-FLAG* | 3200                     |
| CfrV7-GS1-FLAG* | 6400                     |

2 **Supplementary file 1D. Antibiotic susceptibility testing of FLAG constructs.** Minimum  
3 inhibitory concentration (MIC) required to inhibit bacterial growth of *E. coli* BW25113  
4 transformed with pZA plasmid encoding evolved Cfr variants with a C-terminal glycine-serine  
5 linker followed by a FLAG tag. Antibiotic susceptibility testing was performed in two biological  
6 replicates by microbroth dilution in the presence of tiamulin (TIA). Asterisk denotes that the 3'  
7 insertion sequence after the stop codon (3'UTR), which was introduced during directed  
8 evolution, was removed to install the C-terminal tag. Lack of the 3' UTR insertion sequence did  
9 not impact resistance for CfrV6/7.
