# Supplementary material for: Directed evolution of the rRNA methylating enzyme Cfr reveals molecular basis of antibiotic resistance
Source: eLife journal article supplement (doi:10.7554/elife.70017), 2021-11-25
Supplement: fig2-data4 [file Figure 2 - Source Data 4 Info.docx]

**Original files of the full raw unedited blot (for Figure 2 – figure supplement 3a)**

This zip contains the raw uncropped, unedited blot .tif files for Figure 2 – figure supplement 3a. Files are labeled according to the corresponding channel for 2-color detection (IRDye 800CW or DyLight 680) or the composite image. This zip also contains a figure of the uncropped blot with relevant bands for RNA polymerase beta subunit (loading control) and Cfr with its corresponding truncations (asterisks) clearly labeled.
