# Supplementary material for: Directed evolution of the rRNA methylating enzyme Cfr reveals molecular basis of antibiotic resistance
Source: eLife journal article supplement (doi:10.7554/elife.70017), 2021-11-25
Supplement: fig2-data5 [file Figure 2 - Source Data 5 Info.docx]

**Original files of the full raw unedited blot (for Figure 2 – figure supplement 3b)**

This zip contains the raw uncropped, unedited blot .tif files for Figure 2 – figure supplement 3b. Files are labeled according to Chemiluminescence signal or the composite image to include display of the protein ladder. This zip also contains a figure of the uncropped blot with relevant bands for Cfr with its corresponding truncations (asterisks) clearly labeled.
