# Supplementary material for: Directed evolution of the rRNA methylating enzyme Cfr reveals molecular basis of antibiotic resistance
Source: eLife. 2022 Jan 11;11:e70017. doi: 10.7554/eLife.70017 (PMC8752094; doi:10.7554/eLife.70017)
Supplement: Figure 1—source data 1. [file elife-70017-fig1-data1.xlsx]

## Sheet: MIC Numerical Values
		MIC µg/mL
	pZA	Tiamulin	Chloramphenicol	Clindamycin	Linezolid	Trimethoprim
	Empty	400-800	4-8	200	8	0.5-1
	CfrWT	800-1600	8	400	16	0.5-1
	CfrV1	3200-6400	16	800	32	0.5-1
	CfrV2	3200-6400	16	800	32	0.5-1
	CfrV3	6400	16	1600	64	0.5-1
	CfrV4	3200-6400	16	800	32	0.5-1
	CfrV5	6400	16-32	3200	32	0.5
	CfrV6	1600-3200	16	800	32	0.5
	CfrV7	6400, >6400	64	6400	128	0.5
