# Supplementary material for: Directed evolution of the rRNA methylating enzyme Cfr reveals molecular basis of antibiotic resistance
Source: eLife. 2022 Jan 11;11:e70017. doi: 10.7554/eLife.70017 (PMC8752094; doi:10.7554/eLife.70017)
Supplement: Figure 2—source data 2. [file elife-70017-fig2-data2.xlsx]

## Sheet: Panel b
	Sample	Relative Protein Expression (Full Length Cfr)
		Biological Replicate
		1	2	3	4
	CfrWT	1.78	0.81	0.62	0.79
	CfrV1	50.45	56.6	80.13	71.18
	CfrV2	9.66	30.83	25.75	18.33
	CfrV3	42.29	46.98	39.76	54.91
	CfrV4	45.5	65.58	100.74	71.61
	CfrV5	40.96	111.49	96.61	36.4
	CfrV6	37.32	68.67	109.11	98.65
	CfrV7	49.77	93.7	93.9	153.96

## Sheet: Panel c
	Sample	Biological Replicate	Expression Ratio	t Test Exact P Value	Significance Summary
	CfrWT	1	1.52455	-	-
		2	0.825937
		3	0.794168
	CfrV1	1	4.16765	0.0955297	ns
		2	1.4136
		3	2.03779
	CfrV2	1	3.12554	0.0699004	ns
		2	1.70838
		3	1.655
	CfrV3	1	4.46851	0.100464	ns
		2	1.51338
		3	1.83605
	CfrV4	1	3.78144	0.0132389	*
		2	2.26307
		3	3.17145
	CfrV5	1	2.25003	0.201101	ns
		2	1.27799
		3	1.27513
	CfrV6	1	7.65148	0.00179264	**
		2	5.35681
		3	5.31252
	CfrV7	1	9.91256	0.000432288	***
		2	10.6912
		3	9.32411

## Sheet: Panel d
	Sample	% Full Length Cfr Protein
		Biological Replicate
		1	2	3	4
	CfrWT	34.3	28.7	41.4	36
	CfrV1	55.7	49.4	54.6	69.2
	CfrV2	89.1	83.3	83.6	85.6
	CfrV3	91.5	92.5	93.5	89.9
	CfrV4	63.4	65.2	63.5	79.7
	CfrV5	82.4	81	84	74.5
	CfrV6	21.9	21.7	22	29.7
	CfrV7	56.9	54.1	50.9	62.5
