# Supplementary material for: Directed evolution of the rRNA methylating enzyme Cfr reveals molecular basis of antibiotic resistance
Source: eLife. 2022 Jan 11;11:e70017. doi: 10.7554/eLife.70017 (PMC8752094; doi:10.7554/eLife.70017)
Supplement: Figure 2—source data 3. [file elife-70017-fig2-data3.xlsx]

## Sheet: Panel c
	Time (min)	Product (µM)
		CfrWT		CfrV4
		Independent Replicate
		1	2	1	2
	0	0	0	0	0
	2	0.22	0.23	0.19	0.07
	4	0.32	0.51	0.37	0.27
	6	0.97	1.23	0.66	0.64
	8	1.12	1.87	0.98	1.04
