# Supplementary material for: Directed evolution of the rRNA methylating enzyme Cfr reveals molecular basis of antibiotic resistance
Source: eLife. 2022 Jan 11;11:e70017. doi: 10.7554/eLife.70017 (PMC8752094; doi:10.7554/eLife.70017)
Supplement: Figure 2—source data 6. [file elife-70017-fig2-data6.xlsx]

## Sheet: Sheet1
	CHL µg/mL	OD 600 nm
		FLAG_Empty		CfrWT-FLAG		TrunM26_Cfr-FLAG		Trun26-CfrM95L-FLAG		CfrV1-FLAG
		Biological Replicate		Biological Replicate		Biological Replicate		Biological Replicate		Biological Replicate
		1	2	1	2	1	2	1	2	1	2
	0	3.108	2.3254	2.8794	2.9896	2.8896	2.9958	2.9618	2.4256	2.8796	2.4514
	2	1.878	1.6306	2.1956	2.3282	1.146	1.586	1.2728	1.446	2.135	2.2814
	4	0.357	0.4646	1.1392	1.2974	0.5352	0.3284	0.2008	0.3954	1.7252	1.5788
	8	0.002	0.0016	0.0124	-0.0002	0.0082	0.0226	0.055	-0.0004	0.0166	0.3684
	16	0.0018	0.0012	-0.0014	-0.0022	-0.0026	0.0012	-0.0006	0.0004	-0.0004	-0.0018
