# Supplementary material for: Directed evolution of the rRNA methylating enzyme Cfr reveals molecular basis of antibiotic resistance
Source: eLife. 2022 Jan 11;11:e70017. doi: 10.7554/eLife.70017 (PMC8752094; doi:10.7554/eLife.70017)
Supplement: Figure 2—source data 7. [file elife-70017-fig2-data7.xlsx]

## Sheet: Sheet1
	Sample	Relative Protein Expression (All Cfr Bands)				Relative Protein Expression (Ntrun M95 Cfr)
		Biological Replicate				Biological Replicate
		1	2	3	4	1	2	3	4
	CfrWT	1.78	0.96	0.51	0.75	1.78	1.04	0.45	0.73
	CfrV1	30.94	33.12	60.99	37	11.55	14.01	26.28	9.67
	CfrV2	3.73	10.65	12.67	7.75	0.61	2.45	3.54	1.8
	CfrV3	15.87	14.66	17.75	21.97	2	1.54	1.95	3.43
	CfrV4	24.34	28.91	66.79	32.42	5.84	6.03	17.14	4.18
	CfrV5	19.12	50.35	50.14	17.65	5.47	15.08	14.25	7.09
	CfrV6	58.07	91.21	206.15	119.74	34.2	54.99	148.52	72.2
	CfrV7	20.83	38.85	47.69	88.86	11.78	22.99	31.58	52.21
