# Supplementary material for: Directed evolution of the rRNA methylating enzyme Cfr reveals molecular basis of antibiotic resistance
Source: eLife. 2022 Jan 11;11:e70017. doi: 10.7554/eLife.70017 (PMC8752094; doi:10.7554/eLife.70017)
Supplement: Figure 3—source data 2. [file elife-70017-fig3-data2.xlsx]

## Sheet: Panel a
	Sample	Relative Protein Expression (Full-Length Cfr)
		Biological Replicate
		1	2	3	4
	WT	1.78	0.81	0.62	0.79
	N2K	12.99	35.55	24.06	36.74
	N2I	7.32	9.98	16.05	13.85
	I26M	2.01	6.56	3.57	4.28
	S39G	1.89	3.55	2.4	2.39
	Ptet*-V6	11.45	6.19	4.41	34.12

## Sheet: Panel b
	CHL µg/mL	OD 600 nm
		CfrWT			CfrV6			CfrI26M			Ptet*V6
		Biological Replicate			Biological Replicate			Biological Replicate			Biological Replicate
		1	2	3	1	2	3	1	2	3	1	2	3
	0	2.8892	2.2302	2.9588	2.7868	2.7198	2.944	2.9208	2.7898	2.135	2.8096	2.129	2.7098
	1	2.6306	2.6146	2.7858	2.315	2.5184	2.2814	2.7136	2.1212	2.6426	2.5654	2.7514	2.7452
	2	2.4878	2.4364	1.6066	2.7252	2.7724	2.7186	2.3756	2.5408	2.593	2.7672	2.7316	2.7462
	4	1.217	1.3668	1.3668	1.7898	1.6322	1.8974	1.1454	1.3424	1.5472	1.8398	2.2264	2.097
	6	0.0612	0.02	0.8464	0.809	1.3142	1.5996	0.0034	0.0198	1.6884	0.7546	1.4906	1.5842
	8	-0.004	0.0002	0.028	-0.0026	0.0232	1.3802	-0.0018	0.008	0.5782	-0.0022	0.022	1.377
	10	-0.0038	-0.0004	-0.0008	0.0072	0.0114	0.5718	-0.003	-0.001	0.004	-0.0006	0.0008	0.0476
	12	-0.0016	-0.0002	0.001	-0.0024	-0.0012	0.0326	-0.0032	-0.0004	0.0018	-0.0036	-0.0012	0.0002

## Sheet: Panel c
	CHL µg/mL	OD 600 nm
		CfrWT				CfrN2K				CfrI26M				CfrS39G				CfrV3
		Biological Replicate				Biological Replicate				Biological Replicate				Biological Replicate				Biological Replicate
		1	2	3	4	1	2	3	4	1	2	3	4	1	2	3	4	1	2	3	4
	0	2.6444	2.5392	2.647	2.554	2.622	2.7168	2.8552	2.5918	2.7142	2.5532	2.5764	2.56	2.7908	2.554	2.7502	2.677	2.6508	2.6392	2.9544	2.654
	1	1.7746	2.2512	2.8152	2.635	2.526	2.5942	2.7208	2.7294	2.5006	1.9554	2.6502	2.719	2.6062	1.8102	2.7018	2.2516	2.6032	2.8118	2.7252	2.1896
	2	1.4818	1.5536	2.5518	2.5302	2.2374	2.3836	1.9606	2.5932	2.2946	1.7378	2.631	2.1972	2.3422	2.3256	2.5926	2.6136	2.4008	2.5874	2.2864	2.5904
	4	1.7776	1.6682	2.297	2.2592	2.1166	1.8934	2.2108	2.4824	2.0828	2.0402	2.2308	2.381	1.7536	1.7742	2.3268	2.2114	2.3288	1.9308	2.6386	2.4968
	6	1.0484	1.0692	1.6224	1.6694	1.3518	1.7308	2.1538	2.2992	1.1248	1.0712	1.5048	1.2216	1.0542	0.8532	1.6104	1.2412	1.9368	1.7916	2.4896	2.1804
	8	0.321	0.416	0.1296	0.2732	0.7158	0.9164	1.814	1.7674	0.327	0.1386	0.014	0.2336	0.2932	0.2112	0.7796	0.0586	0.652	1.1696	2.0942	1.2012
	10	0.011	0.017	-0.0038	-0.0036	0.1928	0.2252	1.0006	0.722	0.0242	0.011	0.0064	0.0024	0.017	0.0052	-0.0032	-0.0056	0.5618	0.9346	1.068	1.0502
	12	-0.0006	-0.001	-0.0034	-0.0042	0.0178	0.024	0.3064	0.458	-0.0036	-0.0046	-0.0064	-0.005	0.0034	-0.001	-0.0048	-0.007	0.148	0.6108	0.002	0.2508
	16	0.0002	0.011	0.0024	0.0136	-0.0026	-0.0036	0.002	-0.0066	-0.004	-0.0066	-0.0064	-0.006	-0.0038	-0.0066	-0.0062	-0.0062	0.0038	0.037	-0.005	-0.0038
