# Supplementary material for: Directed evolution of the rRNA methylating enzyme Cfr reveals molecular basis of antibiotic resistance
Source: eLife. 2022 Jan 11;11:e70017. doi: 10.7554/eLife.70017 (PMC8752094; doi:10.7554/eLife.70017)
Supplement: Figure 3—source data 3. [file elife-70017-fig3-data3.xlsx]

## Sheet: Sheet1
		Panel a								Panel b
	Sample	Relative Protein Expression (All Cfr Bands)				Relative Protein Expression (Ntrun M95 Cfr)				% Full-Length Cfr
		Biological Replicate				Biological Replicate				Biological Replicate
		1	2	3	4	1	2	3	4	1	2	3	4
	WT	1.78	0.96	0.51	0.75	1.78	1.04	0.45	0.73	24.7	29.17	29.93	18.32
	N2K	3.98	12.29	9.21	9.14	1.08	2.74	2.86	3.18	80.4	84.2	78.19	72.61
	N2I	2.91	2.02	2.74	3.07	1.48	0.74	0.74	0.75	64.7	68.49	76.42	81.07
	I26M	1.2	4.67	2.96	1.7	0.56	2.41	1.54	0.69	40.8	40.9	36.2	45.46
	S39G	1.07	2.43	1.75	1.39	0.81	1.97	1.47	1.19	43.1	42.85	41.07	29.44
	Ptet*-V6	9.13	6.81	3.41	27.68	8.3	7.14	2.99	23.38	32.9	31.12	38.33	30.81
