# Supplementary material for: Directed evolution of the rRNA methylating enzyme Cfr reveals molecular basis of antibiotic resistance
Source: eLife. 2022 Jan 11;11:e70017. doi: 10.7554/eLife.70017 (PMC8752094; doi:10.7554/eLife.70017)
Supplement: Figure 3—source data 5. [file elife-70017-fig3-data5.xlsx]

## Sheet: Panel a
	CHL µg/mL	OD 600 nm
		CfrWT			CfrN2I			CfrV5
		Biological Replicate			Biological Replicate			Biological Replicate
		1	2	3	1	2	3	1	2	3
	0	3.0356	2.4012	2.9326	2.686	2.9404	2.4492	2.1384	2.766	2.5432
	1	1.7742	1.9522	2.7992	2.8854	2.3414	1.9976	2.608	2.7472	2.415
	2	2.6186	2.6892	2.6116	2.496	2.1098	2.6112	1.9466	2.6302	2.4468
	4	1.58	2.1786	1.7588	2.5052	2.532	2.47	2.3634	2.6158	2.5816
	6	0.764	0.8182	1.2504	1.426	1.7048	1.9328	2.1512	2.0326	2.2738
	8	0.0116	0.0178	0.0254	0.9438	0.802	0.9898	1.431	1.3462	1.7014
	10	0	-0.0002	0.0006	0.0574	0.0206	0.0262	0.6118	0.0806	1.5796
	12	-0.001	0.0008	0.0014	0.003	0.0006	0.005	0.1156	0.0248	0.5408
	16	0.0142	0.0156	0.0126	0.0076	-0.0004	-0.0004	0.0004	-0.002	0.0014

## Sheet: Panel b
	Sample	Relative Protein Expression (Full-Length Cfr)
		Biological Replicate
		1	2	3	4
	CfrWT	1.78	0.81	0.62	0.79
	CfrN2K	12.99	35.55	24.06	36.74
	CfrC338A	1	1
	CfrN2K_C338A	12.2994	26.1598
