# Supplementary material for: Directed evolution of the rRNA methylating enzyme Cfr reveals molecular basis of antibiotic resistance
Source: eLife. 2022 Jan 11;11:e70017. doi: 10.7554/eLife.70017 (PMC8752094; doi:10.7554/eLife.70017)
Supplement: Figure 4—source data 2. [file elife-70017-fig4-data2.xlsx]

## Sheet: Panel b
	Fraction	% mRNA
		Empty-recA			CfrWT-recA			CfrN2K-recA			CfrV4-recA
	1.5	5.7	2	3.9	3.3	3.5	2.3	0.4	2.9	2.5	2.8	1.9	2.5
	3.5	1.5	0.8	0.7	1.2	0.9	1.5	0.2	0.9	1	1.1	1.2	1.5
	5	2.2	0.8	0.8	1.1	0.9	0.3	0.3	0.9	1.2	1	0.6	0.7
	6	2	2.5	1	2.3	4.8	3.3	0.9	0.9	2.4	1.2	0.6	4
	7	1.8	2.4	1.2	1.7	1.5	2.8	0.2	6.2	2.7	1.4	1.3	1.3
	8	4.8	1.8	6.8	5.4	5.6	2.7	1.6	2.3	1.7	2.7	2.9	3.5
	9	4.4	3.4	3.1	4.3	4.1	4.2	1.2	6.4	3	6.4	4.9	3
	10	4.8	5.4	5.7	9.1	5	2.7	1.8	3	6.1	5.6	3.3	4.6
	11	9.9	5.8	11.6	3	7.1	4.9	4.1	4.3	5.7	2.8	5.7	4.7
	12	10.9	9.7	11.7	4.7	13.4	9.1	5.3	13	7.2	5.3	12.8	11
	13	17.6	17.4	9.6	9	19.1	19.3	16.7	18.2	11.2	5.5	14.5	24.6
	14	11.3	14.9	16.5	11.5	15.6	25.7	25.7	9.7	18.3	13.4	18.9	16.7
	15	10	19.8	16.3	17.1	11.6	12	19.2	13.5	23.1	19.8	21.9	13.2
	16.5	9.2	9.1	7.8	19.8	4.2	5.5	17	13.8	8.2	23	6.4	5.4
	18.5	3.9	4	3.3	6.5	2.7	3.8	5.5	4	5.7	8.1	3.2	3.1

## Sheet: Panel c
	Fraction	% mRNA
		CfrWT-cfr			CfrN2K-cfr
	1.5	1	1.2	0.5	0.39	2	1.3
	3.5	1.34	1.4	0.5	0.44	3.2	3.8
	5	0.36	1.3	0.3	0.39	0.6	1.8
	6	0.16	3.1	2.1	3.8	2.8	2.9
	7	2.63	10	3.9	2.31	6.6	8.5
	8	11.87	17.6	7.2	8.57	8.2	8.5
	9	11.19	17.3	11.2	6.3	9.7	9.8
	10	14.08	12.9	14	6.92	12	16.6
	11	15.06	12	16	12.79	10	10.5
	12	12.9	10.5	13.7	11.2	9.3	15.4
	13	12.09	4.9	12.1	15.52	12.4	7.7
	14	8.09	2.5	5.8	14.03	8.2	3.5
	15	4.67	2.5	1.7	9.91	7.6	4.4
	16.5	3.15	1.7	7.3	5.96	5	3.5
	18.5	1.42	1	3.6	1.47	2.4	1.6

## Sheet: Panel d
	Fraction	% mRNA
		CfrWT-cfr			CfrV4-cfr
	1.5	1	1.2	0.5	0.33	1.4	1.1
	3.5	1.34	1.4	0.5	0.49	1.1	0.6
	5	0.36	1.3	0.3	0.16	0.4	0.2
	6	0.16	3.1	2.1	0.4	0.5	1.1
	7	2.63	10	3.9	0.32	1.3	3.7
	8	11.87	17.6	7.2	3.29	3.4	4.7
	9	11.19	17.3	11.2	11.45	6.2	6.4
	10	14.08	12.9	14	12.34	7	5.6
	11	15.06	12	16	9.6	7.6	9.3
	12	12.9	10.5	13.7	13.45	11.2	6.7
	13	12.09	4.9	12.1	11.89	9.6	11.1
	14	8.09	2.5	5.8	14.05	13.6	9.1
	15	4.67	2.5	1.7	10.1	10	14.1
	16.5	3.15	1.7	7.3	9.24	15.5	15.6
	18.5	1.42	1	3.6	2.88	11.2	10.7

## Sheet: Panel e
	Time (min)	% Initial Cfr Protein
		CfrWT			CfrN2K			CfrN2I			CfrS39G			CfrI26M			CfrV3
		Biological Replicate			Biological Replicate			Biological Replicate			Biological Replicate			Biological Replicate			Biological Replicate
		1	2	3	1	2	3	1	2	3	1	2	3	1	2	3	1	2	3
	0	100	100	100	100	100	100	100	100	100	100	100	100	100	100	100	100	100	100
	20	66.567	64.8338	48.1579	77.1917	93.3584	76.7367	86.7108	90.5034	92.7669	67.6676	96.1572	112.995	96.4344	111.904	91.1405	84.1594	82.3868	98.067
	40	25.3338	19.7782	27.8893	45.3137	65.5036	46.3372	61.1037	66.2526	66.0401	55.0072	34.5277	73.5177	91.5445	91.6307	83.561	78.7446	48.0934	86.4823
	60	17.3701	15.517	17.4313	31.6189	56.3645	39.0517	44.7762	47.7875	49.7759	49.3569	16.3758	31.1337	71.6554	84.7027	96.0584	77.778	47.7951	89.6843
	80	14.4892	11.9345	24.1865	25.0622	29.9706	37.1029	31.3845	29.5813	46.3983	51.114	23.9556	39.1996	69.3627	111.286	123.946	76.9026	61.7362	83.5022
	100	25.1014	9.55336	10.701	23.0339	40.9271	39.962	35.3686	21.1514	28.2175	37.0382	15.6798	17.5179	62.3332	73.4547	128.806	85.0895	40.8897	62.7225
