# Supplementary material for: Directed evolution of the rRNA methylating enzyme Cfr reveals molecular basis of antibiotic resistance
Source: eLife. 2022 Jan 11;11:e70017. doi: 10.7554/eLife.70017 (PMC8752094; doi:10.7554/eLife.70017)
Supplement: Figure 4—source data 3. [file elife-70017-fig4-data3.xlsx]

## Sheet: Panel a
	Fraction	% mRNA
		CfrWT-cfr			CfrWT-recA
	1.5	1	1.2	0.5	3.3	3.5	2.3
	3.5	1.34	1.4	0.5	1.2	0.9	1.5
	5	0.36	1.3	0.3	1.1	0.9	0.3
	6	0.16	3.1	2.1	2.3	4.8	3.3
	7	2.63	10	3.9	1.7	1.5	2.8
	8	11.87	17.6	7.2	5.4	5.6	2.7
	9	11.19	17.3	11.2	4.3	4.1	4.2
	10	14.08	12.9	14	9.1	5	2.7
	11	15.06	12	16	3	7.1	4.9
	12	12.9	10.5	13.7	4.7	13.4	9.1
	13	12.09	4.9	12.1	9	19.1	19.3
	14	8.09	2.5	5.8	11.5	15.6	25.7
	15	4.67	2.5	1.7	17.1	11.6	12
	16.5	3.15	1.7	7.3	19.8	4.2	5.5
	18.5	1.42	1	3.6	6.5	2.7	3.8

## Sheet: Panel b
	Fraction	% mRNA
		CfrN2K-cfr			CfrN2K-recA
	1.5	0.39	2	1.3	0.4	2.9	2.5
	3.5	0.44	3.2	3.8	0.2	0.9	1
	5	0.39	0.6	1.8	0.3	0.9	1.2
	6	3.8	2.8	2.9	0.9	0.9	2.4
	7	2.31	6.6	8.5	0.2	6.2	2.7
	8	8.57	8.2	8.5	1.6	2.3	1.7
	9	6.3	9.7	9.8	1.2	6.4	3
	10	6.92	12	16.6	1.8	3	6.1
	11	12.79	10	10.5	4.1	4.3	5.7
	12	11.2	9.3	15.4	5.3	13	7.2
	13	15.52	12.4	7.7	16.7	18.2	11.2
	14	14.03	8.2	3.5	25.7	9.7	18.3
	15	9.91	7.6	4.4	19.2	13.5	23.1
	16.5	5.96	5	3.5	17	13.8	8.2
	18.5	1.47	2.4	1.6	5.5	4	5.7

## Sheet: Panel c
	Fraction	% mRNA
		CfrV4-cfr			CfrV4-recA
	1.5	0.33	1.4	1.1	2.8	1.9	2.5
	3.5	0.49	1.1	0.6	1.1	1.2	1.5
	5	0.16	0.4	0.2	1	0.6	0.7
	6	0.4	0.5	1.1	1.2	0.6	4
	7	0.32	1.3	3.7	1.4	1.3	1.3
	8	3.29	3.4	4.7	2.7	2.9	3.5
	9	11.45	6.2	6.4	6.4	4.9	3
	10	12.34	7	5.6	5.6	3.3	4.6
	11	9.6	7.6	9.3	2.8	5.7	4.7
	12	13.45	11.2	6.7	5.3	12.8	11
	13	11.89	9.6	11.1	5.5	14.5	24.6
	14	14.05	13.6	9.1	13.4	18.9	16.7
	15	10.1	10	14.1	19.8	21.9	13.2
	16.5	9.24	15.5	15.6	23	6.4	5.4
	18.5	2.88	11.2	10.7	8.1	3.2	3.1
