# Supplementary material for: Directed evolution of the rRNA methylating enzyme Cfr reveals molecular basis of antibiotic resistance
Source: eLife. 2022 Jan 11;11:e70017. doi: 10.7554/eLife.70017 (PMC8752094; doi:10.7554/eLife.70017)
Supplement: Figure 6—source data 1. [file elife-70017-fig6-data1.xlsx]

## Sheet: Panel b
	CHL µg/mL	OD 600 nm
		Empty		CfrWT		MKE-Cfr
		Biological Replicate		Biological Replicate		Biological Replicate
		1	2	1	2	1	2
	0	2.8196	2.8714	2.3904	2.6292	2.7272	2.5424
	1	2.4798	2.4852	2.6424	2.6776	2.8672	2.2162
	2	1.9314	1.9878	2.6816	2.621	2.6504	2.664
	4	0.513	0.5466	2.4582	2.0336	2.622	2.5642
	6	-0.0016	0.0062	1.8304	2.0516	2.3714	2.431
	8	-0.0012	-0.002	0.2676	0.5014	1.5058	2.0902
	10	-0.0034	-0.0024	0.034	-0.004	0.846	0.9524
	12	-0.0028	-0.003	-0.0034	-0.005	-0.0042	0.252
	16	-0.001	0.0002	-0.0044	-0.0044	-0.0054	-0.0056

## Sheet: Panel c
	Sample	Relative Protein Expression (Full-Length Cfr)
		Biological Replicate
		1	2	3	4
	WT	1.78	0.81	0.62	0.79
	N2K	12.99	35.55	24.06	36.74
	N2I	7.32	9.98	16.05	13.85
	I26M	2.01	6.56	3.57	4.28
	S39G	1.89	3.55	2.4	2.39
	Ptet*-V6	11.45	6.19	4.41	34.12
	MKE-Cfr	8.92	24.45	28.44	29.75
