# Supplementary material for: Directed evolution of the rRNA methylating enzyme Cfr reveals molecular basis of antibiotic resistance
Source: eLife. 2022 Jan 11;11:e70017. doi: 10.7554/eLife.70017 (PMC8752094; doi:10.7554/eLife.70017)
Supplement: Figure 6—source data 3. [file elife-70017-fig6-data3.xlsx]

## Sheet: Panel b
	CHL µg/mL	OD 600 nm
		Empty		SCFS1_CfrWT		SCFS1_CfrM(-3)I		SCFS1_CfrM1I
		Biological Replicate		Biological Replicate		Biological Replicate		Biological Replicate
		1	2	1	2	1	2	1	2
	0	2.7718	2.5539	2.7586	2.4867	2.3876	2.5295	2.5482	2.8477
	1	1.8704	1.1323	2.5122	2.1365	2.3166	2.2251	1.8448	2.3171
	2	1.427	0.8059	2.1018	1.9197	1.8158	2.0201	1.4472	1.5907
	4	0.4016	-0.0017	1.0576	0.7617	0.4586	1.0295	0.0088	0.0171
	6	-0.0016	-0.0005	0.0132	0.0953	0.0104	0.2647	-0.0002	0.0073
	8	-0.0022	-0.0025	0.0036	0.0029	0.0002	0.0039	-0.0012	0.0011
